# Supplementary material for: ABPP-HT*—Deep Meets Fast for Activity-Based Profiling of Deubiquitylating Enzymes Using Advanced DIA Mass Spectrometry Methods
Source: MDPI journal article supplement (doi:10.3390/ijms23063263), 2022-03-17
Supplement: s1 [file s1]

**Figure S1**

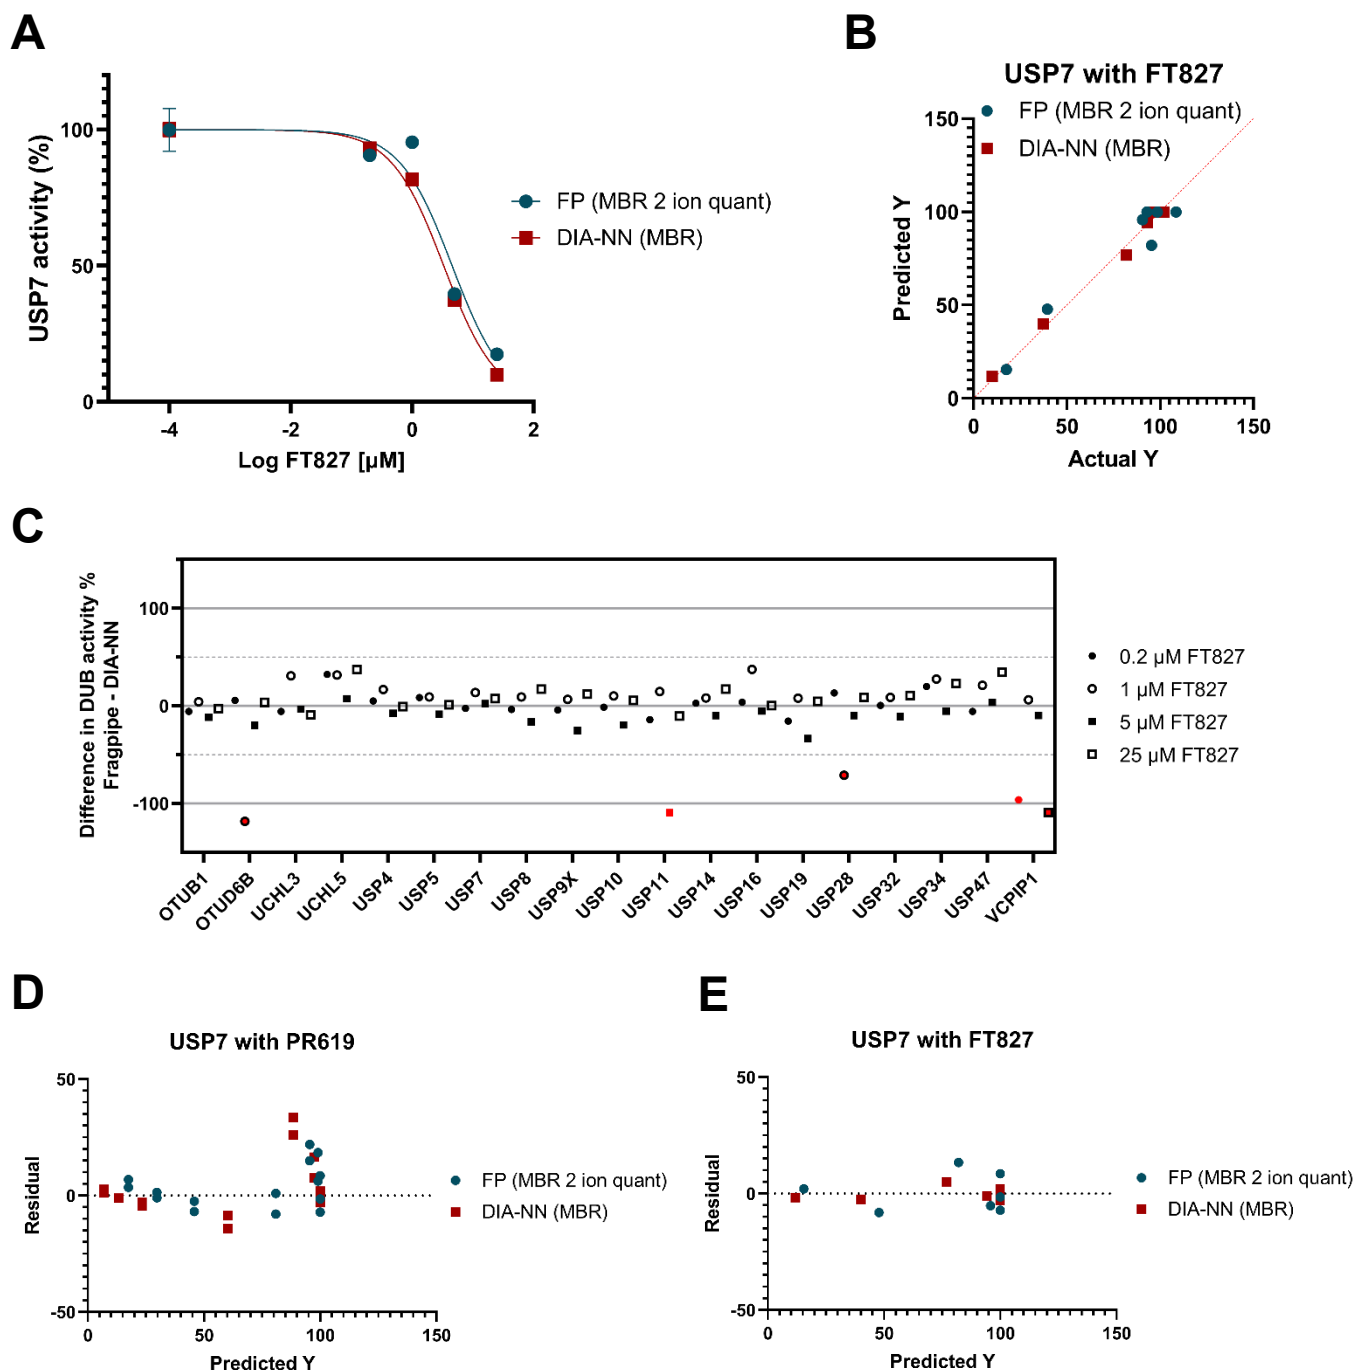

**Supplementary Figure S1. A)** USP7  $IC_{50}$  curve showing reduction of USP7 intensity with increasing FT827 concentrations, collected as either DIA data analysed with DIA-NN MBR\* or DDA data Fragpipe data 2 ion quant MBR\* fit to  $Y=100/(1+10^{((X-LogIC_{50}))})$ . \*MBR as part of a larger dataset with other inhibitors. **B)** Predicted vs actual Y values of the  $IC_{50}$  curve shown in A. **C.** Difference plot of common DUBs identified by both DIA-NN MBR and Fragpipe 2 ion quant MBR with DIA-NN % activity subtracted from Fragpipe % activity at various FT827 concentrations. Values in red are attributed to missing

values and not as a result of inhibition differences due to their reduction not occurring in a concentration dependent manner with increasing inhibitor concentration. **D)** Residual vs predicted Y for USP7 with PR619  $IC_{50}$  fit. **E)** Residual vs predicted Y for USP7 with FT827  $IC_{50}$  fit.

## Supplementary Table 1

| Start m/z | End m/z | Start 1/k0 | End 1/k0 |
|-----------|---------|------------|----------|
| 400       | 425     | 0.6        | 0.834    |
| 425       | 450     | 0.6        | 0.858    |
| 450       | 475     | 0.6        | 0.883    |
| 475       | 500     | 0.6        | 0.908    |
| 500       | 525     | 0.6        | 0.932    |
| 525       | 550     | 0.6        | 0.957    |
| 550       | 575     | 0.6        | 0.982    |
| 575       | 600     | 0.6        | 1.005    |
| 600       | 625     | 0.835      | 1.031    |
| 625       | 650     | 0.858      | 1.055    |
| 650       | 675     | 0.884      | 1.079    |
| 675       | 700     | 0.909      | 1.105    |
| 700       | 725     | 0.934      | 1.129    |
| 725       | 750     | 0.958      | 1.153    |
| 750       | 775     | 0.983      | 1.179    |
| 775       | 800     | 1.006      | 1.202    |
| 800       | 825     | 1.032      | 1.638    |
| 825       | 850     | 1.056      | 1.638    |
| 850       | 875     | 1.08       | 1.638    |
| 875       | 900     | 1.106      | 1.638    |
| 900       | 925     | 1.13       | 1.638    |
| 925       | 950     | 1.154      | 1.638    |
| 950       | 975     | 1.18       | 1.638    |
| 975       | 1000    | 1.204      | 1.638    |

**Supplementary Table 1**

DIA-PASEF windows for data in Figures 1, 2 ,3C - E + 4.

## Supplementary Table 2

| Start m/z | End m/z | Start 1/k0 | End 1/k0 |
|-----------|---------|------------|----------|
| 475       | 500     | 0.85       | 0.89     |
| 500       | 525     | 0.85       | 0.91     |
| 525       | 550     | 0.85       | 0.93     |
| 550       | 575     | 0.85       | 0.95     |
| 575       | 600     | 0.85       | 0.97     |
| 600       | 625     | 0.85       | 0.99     |
| 625       | 650     | 0.85       | 1.01     |
| 650       | 675     | 0.87       | 1.03     |
| 675       | 700     | 0.89       | 1.04     |
| 700       | 725     | 0.91       | 1.06     |
| 725       | 750     | 0.93       | 1.08     |
| 750       | 775     | 0.95       | 1.1      |
| 775       | 800     | 0.97       | 1.12     |
| 800       | 825     | 0.99       | 1.14     |
| 825       | 850     | 1.01       | 1.16     |
| 850       | 875     | 1.03       | 1.18     |
| 875       | 900     | 1.05       | 1.2      |
| 900       | 925     | 1.07       | 1.22     |
| 925       | 950     | 1.08       | 1.24     |
| 950       | 975     | 1.1        | 1.26     |
| 975       | 1000    | 1.12       | 1.27     |

### ***Supplementary Table 2***

DIA-PASEF windows for data in Figures 3A + B.
